# Supplementary material for: FeOCl/Ln (Ln = La or Y): efficient photo-Fenton catalysts for ibuprofen degradation
Source: Royal Society of Chemistry journal article supplement (doi:10.1039/c9nj03746b), 2019-01-01
Supplement: c9nj03746b1.pdf [file c9nj03746b1.pdf]

Electronic Supplementary Material (ESI) for New Journal of Chemistry

**Supplementary data for**

**FeOCl/Ln (Ln=La or Y): efficient photo-Fenton catalysts for ibuprofen  
degradation**

Xiaohua Shi<sup>a</sup>, Chao Cui<sup>b</sup>, Lei Zhang<sup>b</sup>, Jian Zhang<sup>b\*</sup> and Guodong Liu<sup>b\*</sup>

---

<sup>a</sup>. *Department of Bioengineering, Shandong Polytechnic, Jinan, 250104, P. R. China*

<sup>b</sup>. *Department of chemistry and chemical engineering, Jining University, Qufu 273100, P. R. China*

Corresponding Author, E-mail: sduchemzhang@163.com; liugd615@163.com

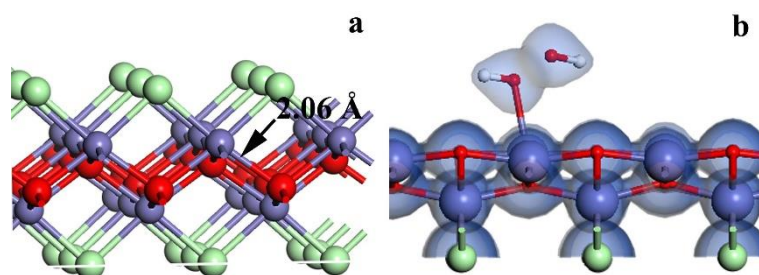

Fig.S1 Optimized structures of (a) FeOCl, total charge densities of H<sub>2</sub>O<sub>2</sub> adsorption on Fe-site.

The isosurface level is 0.5

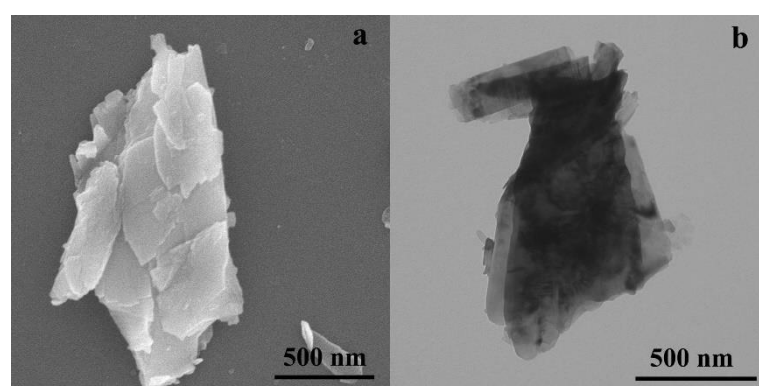

Fig.S2 (a) SEM and (b) TEM images of FeOCl/Y

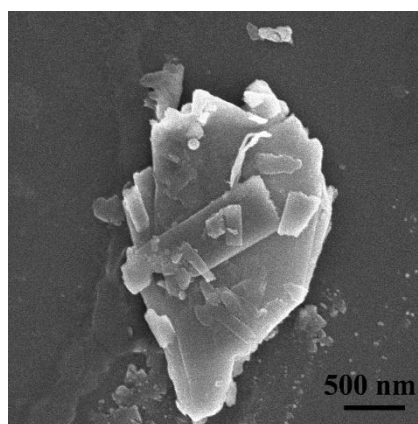

Fig.S3 SEM image of FeOCl

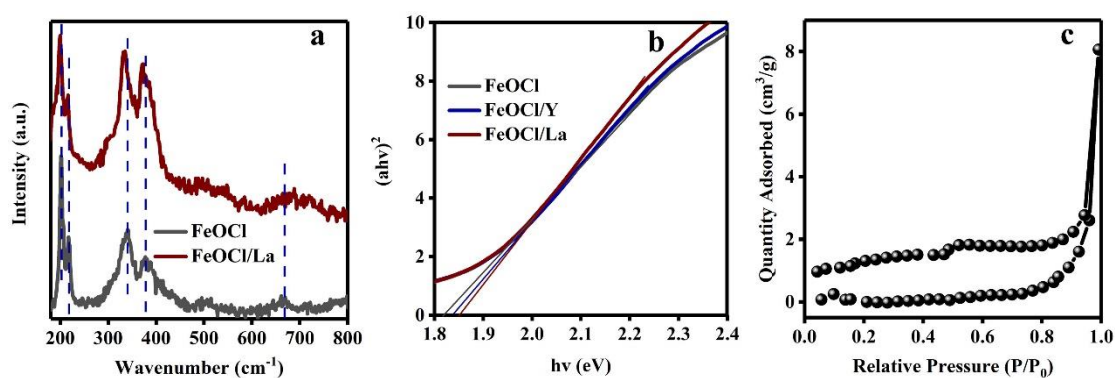

Fig.S4 (a) Raman spectrum and (b) band gaps of FeOCl and FeOCl/Ln, (c) N<sub>2</sub> adsorption-desorption isotherms of FeOCl

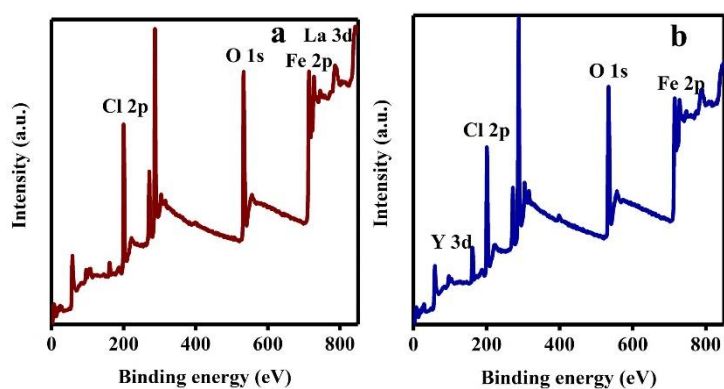

Fig.S5 the full-range XPS spectrum of (a) FeOCl/La and (b) FeOCl/Y

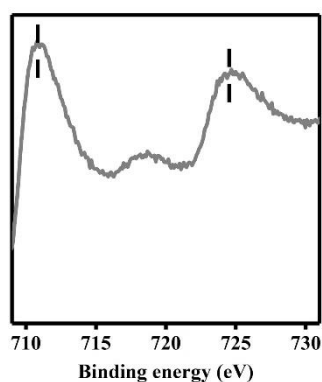

Fig.S6 XPS spectrum of Fe 2p in FeOCl

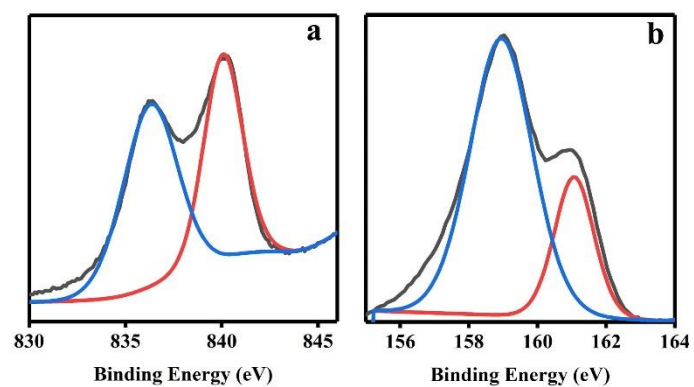

Fig.S7 XPS spectrum of (a) La 3d in  $\text{La}_2\text{O}_3$  and (b) Y 3d in  $\text{Y}_2\text{O}_3$

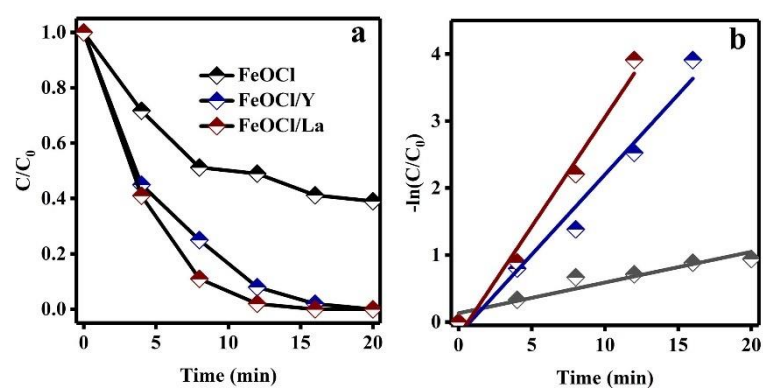

Fig.S8 (a) catalytic degradation and (b) the corresponding kinetic plots over FeOCl, FeOCl/La and FeOCl/Y

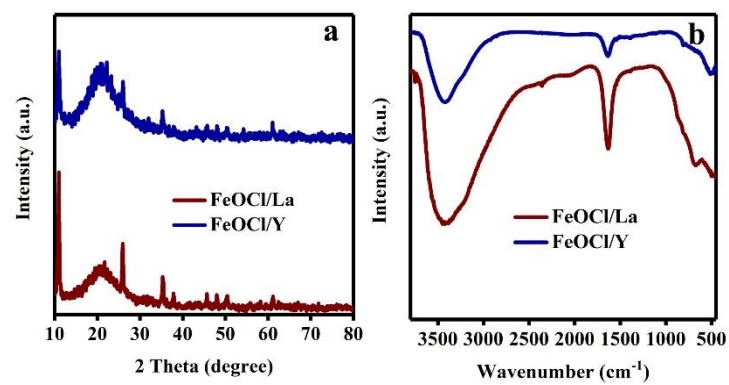

Fig.9 (a) XRD patterns and (b) FTIR spectrum of FeOCl/Ln after reaction

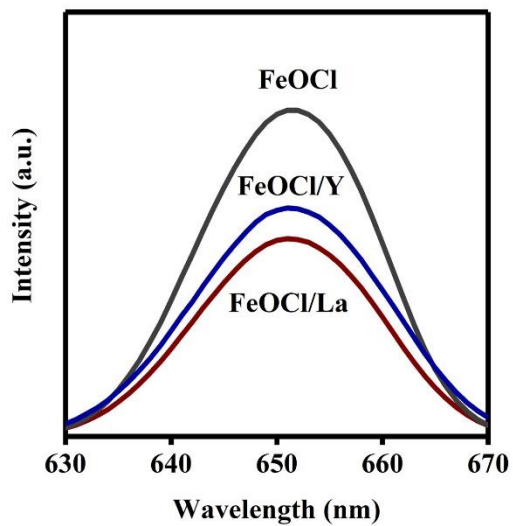

Fig.S10 Photoluminescence spectra of FeOCl and FeOCl/Ln

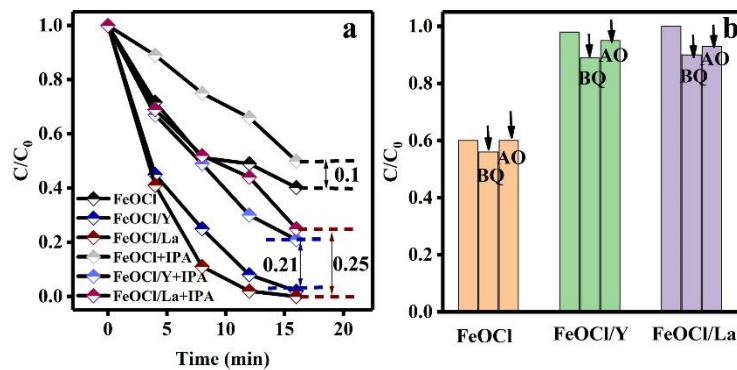

Fig.S11 photo-Fenton catalytic activities of FeOCl and FeOCl/Ln with (a) IPA, (b) BQ and AO,

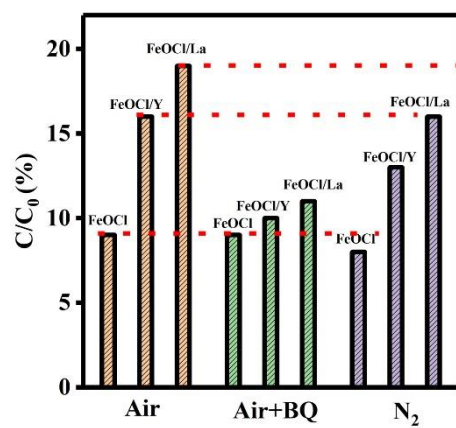

Fig.S12 trapping experiments and photocatalytic activities under  $N_2$  deaerated solution
